# Supplementary material for: Direct inhibition of phosphate transport by immune signaling in Arabidopsis
Source: PubMed Central journal article supplement — Curr Biol. 2022 Jan 24;32(2):488–495.e5. doi: 10.1016/j.cub.2021.11.063 (PMC8791604; doi:10.1016/j.cub.2021.11.063), 2022-01-24
Supplement: mmc1.pdf [file mmc1.pdf]

**Current Biology, Volume 32**

**Supplemental Information**

**Direct inhibition of phosphate transport**

**by immune signaling in *Arabidopsis***

**Julian Dindas, Thomas A. DeFalco, Gang Yu, Lu Zhang, Pascale David, Marta Bjornson, Marie-Christine Thibaud, Valéria Custódio, Gabriel Castrillo, Laurent Nussaume, Alberto P. Macho, and Cyril Zipfel**

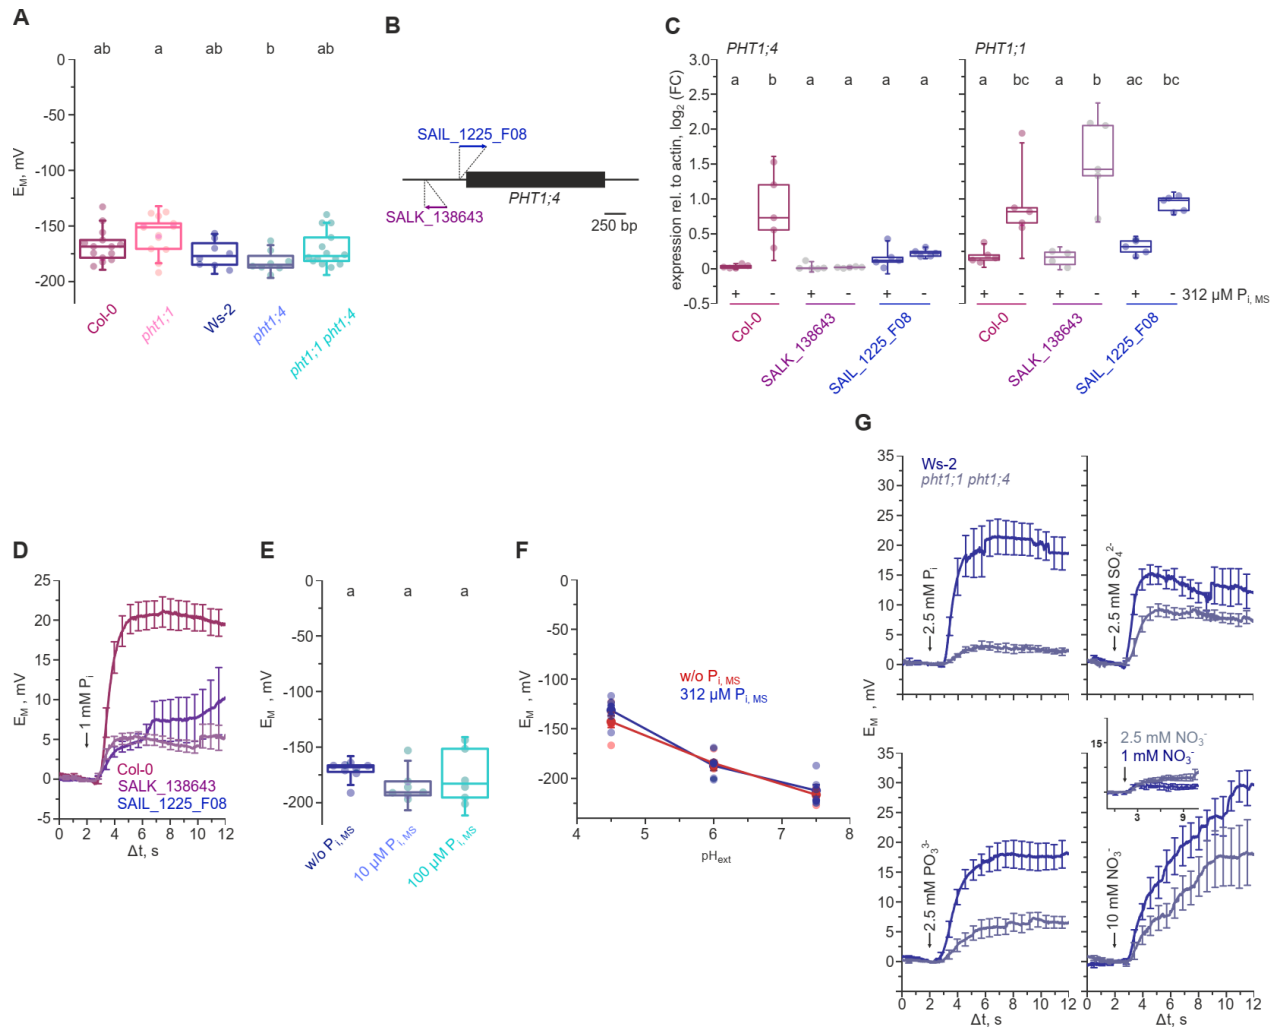

**Figure S1: Electrophysiological characterization of PHT1-mediated  $P_i$  transport. Related to Figure 1.**

**(A)** Boxplot of resting  $E_M$  values averaged over the 5 s before  $P_i$  application. Values correspond to measurements shown in Figure 2A and B. **(B)** Illustration highlighting the genomic locus of *PHT1;4* and the position of analysed T-DNA insertion mutants. **(C)** Transcript analysis of *PHT1;1* (right panel) and *PHT1;4* (left panel) in Col-0 and the homozygous *PHT1;4* T-DNA insertion mutants SALK\_138643 and SAIL\_1225\_F08 grown on media supplemented without or with 312  $\mu M$   $P_i$ . **(D)** Averaged responses of the PM potential to application of 1 mM inorganic  $P_i$  at pH 6. The response was tested in Col-0 and the homozygous *PHT1;4* T-DNA insertion mutants SALK\_138643 and SAIL\_1225\_F08 grown on media supplemented without  $P_i$ . Curves are normalized and aligned to the point of  $P_i$  application ( $\Delta t = 2$ ). Error bars show  $\pm$ SEM ( $n = 6$ ). **(E)** Boxplot of resting  $E_M$  values for seedlings grown at the indicated  $P_i$  conditions. Values were averaged over the 5 s before  $P_i$  application. Values correspond to measurements shown in Figure 2D. **(F)** Straight lines connect average resting  $E_M$  values averaged over the 5 s before  $P_i$  application for external pH values of 4.5, 6 and 7.5 and seedlings grown on media supplemented without or with 312  $\mu M$   $P_i$ . Values correspond to measurements shown in Figure 2E. Light colored points highlight individual measurements. Error bars show  $\pm$ SEM. **(G)** Averaged responses of the PM potential to application of 2.5 mM  $P_i$ , phosphite, sulfate and 10 mM nitrate at pH 6. The measurements correspond to Figure 2G and H. The responses were tested in Ws-2 and in the double mutant *pht1;1 pht1;4*. Curves are normalized and aligned to the point of  $P_i$  application ( $\Delta t = 2$ ). The inset in the left panel shows the tested nitrate concentrations  $<10$  mM on Ws-2 seedlings. Error bars show  $\pm$ SEM ( $n = 6$  to 8). Boxes indicate the 25 and 75 percentile, the horizontal line shows the median, error bars represent  $\pm$ SD. Closed circles show individual measurements. When indicated significance was tested with a one-way ANOVA and a post-hoc Tukey test. Equal letters at the top of the panel indicate  $p > 0.05$ .

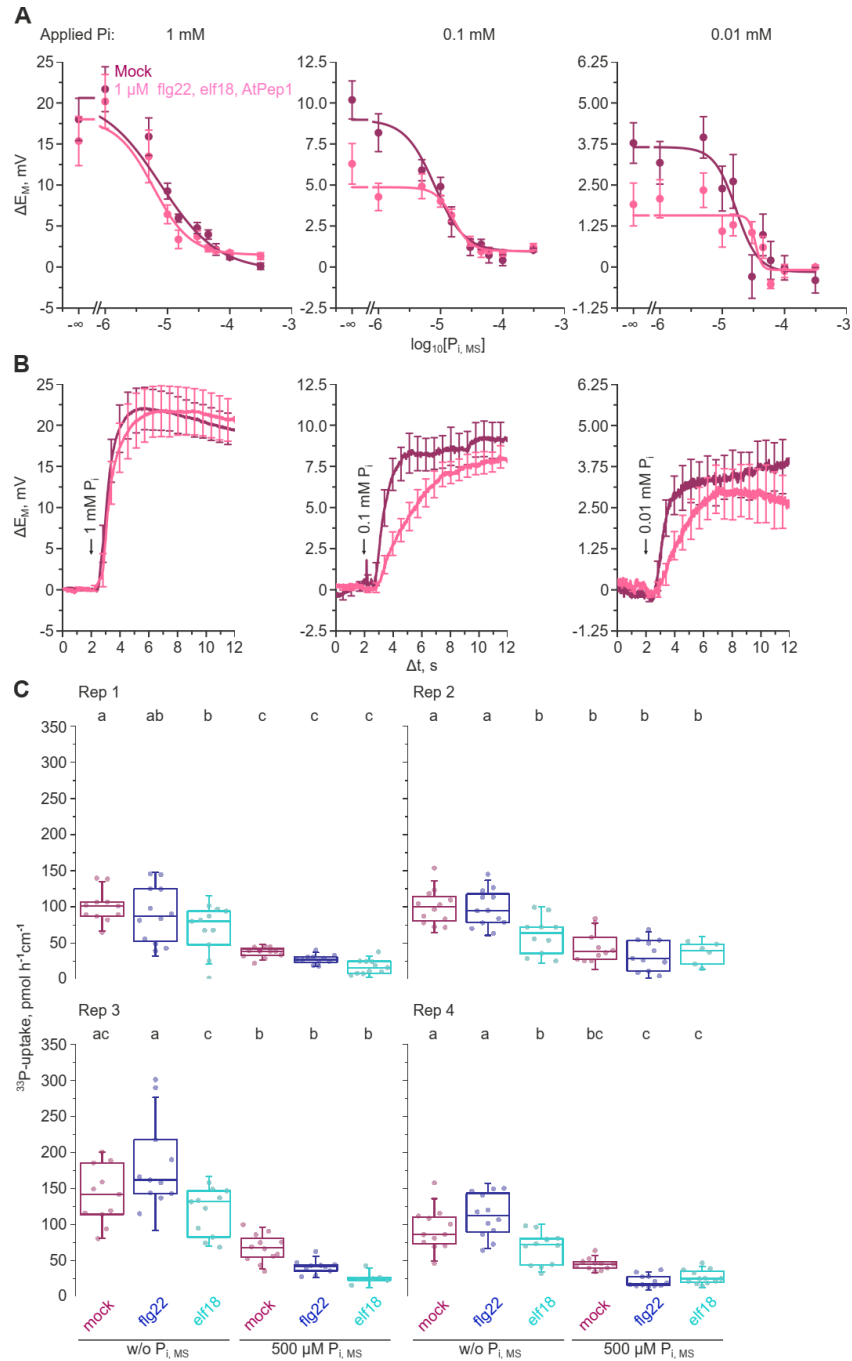

**Figure S2: Effect of elicitor treatment on  $P_i$  transport. Related to Figure 2. (A)** Dose response curves for  $P_i$ -induced depolarization of Col-0 root hairs in dependence of the  $P_i$  concentration in the growth media. Applied  $P_i$  concentration was 1 mM, 0.1 mM or 0.01 mM, as indicated. Responses were measured without or after a 15 to 30 min pretreatment with an elicitor mix of 1  $\mu$ M flg22, elf18 and AtPep1. Values correspond to the average  $\Delta E_M$  values at  $\Delta t = 4.5$  to 5.5. Error bars show  $\pm$ SEM. Solid lines show fits of sigmoidal dose-response curves. Error bars show  $\pm$ SEM ( $n = 5$  to 11). **(B)** Averaged responses of the PM potential to application of 1 mM, 0.1 mM, or 0.01 mM  $P_i$  in Col-0 root hairs grown at 1  $\mu$ M  $P_i$ . Curves are normalized and aligned to the point of phosphate application ( $\Delta t = 2$ ). Measurements correspond to those in (A). Error bars show  $\pm$ SEM ( $n = 5$  to 11). **(C)** Biologically-independent replicates of radioactive  $P_i$ -uptake experiments corresponding to Figure 2B. Boxes indicate the 25 and 75 percentile, the horizontal line shows the median, error bars represent  $\pm$ SD. Closed circles show individual measurements. Significance was tested with a one-way ANOVA and a post-hoc Tukey test. Equal letters at the top of the panel indicate  $p > 0.05$ .

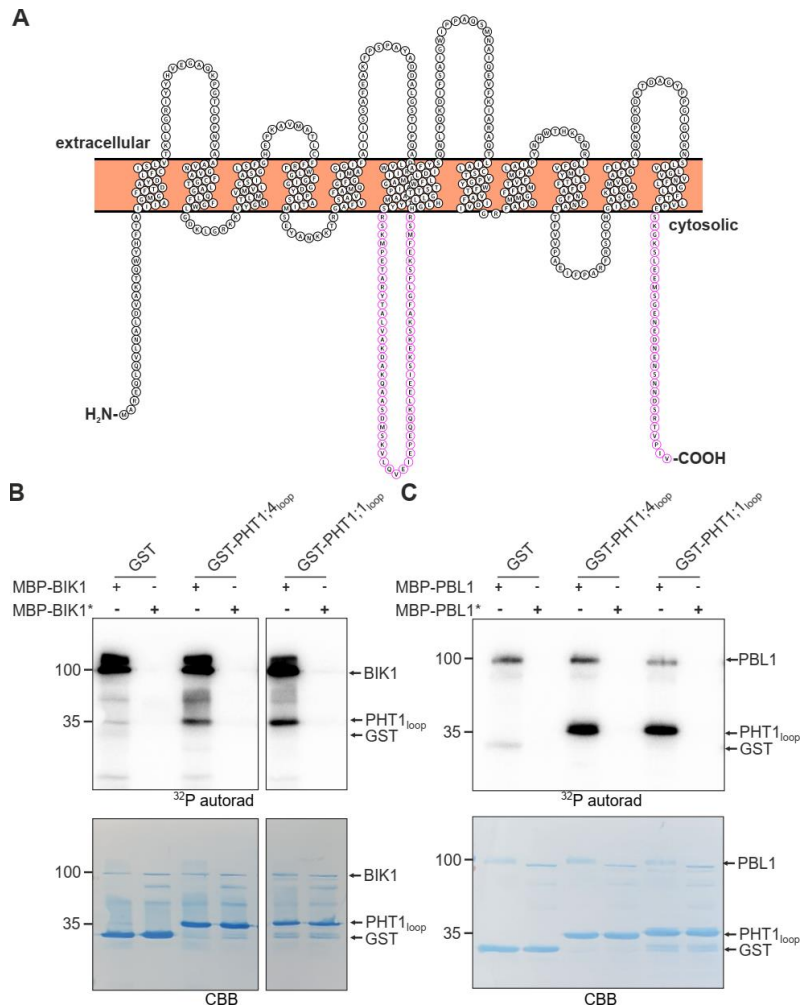

**Figure S3: PHT1;4 and PHT1;4 are substrates for BIK1 and PBL1. Related to Figure 3. (A)** Predicted topology of PHT1;4 with the large cytosolic loop and C-terminus highlighted in magenta. Prediction with: <https://wlab.ethz.ch/protter>. **(B and C)** <sup>32</sup>P kinase assay showing *in vitro* transphosphorylation of the PHT1;4 and PHT1;1 cytosolic loops by BIK1 (B) and PBL1 (C). Asterisk indicates kinase-dead variant. Kinase assays were repeated at least twice with similar results.

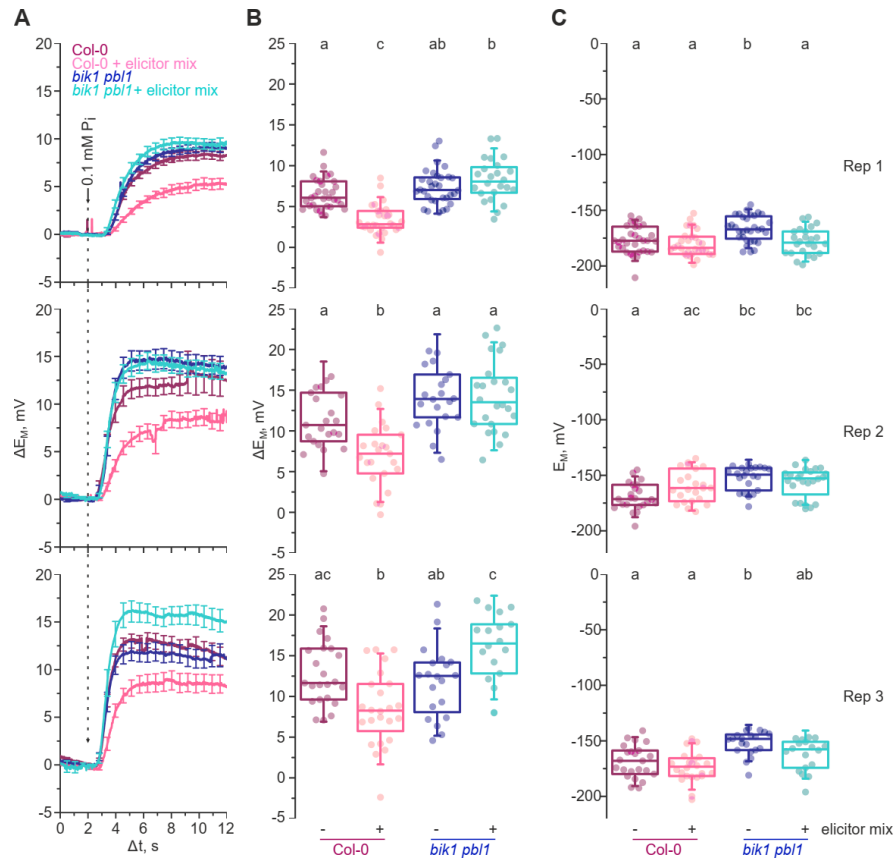

**Figure S4: Biologically-independent replicates corresponding to Figure 3D and E.** (A) Averaged responses of the PM potential to application of 0.1 mM  $P_i$  at pH 6 without or after a 15 to 30 min pretreatment with an elicitor mix of 1  $\mu$ M flg22, elf18 and AtPep1. The response was tested in Col-0 and the *bik1 pbl1* double mutant. Curves are normalized and aligned to the point of  $P_i$  application ( $\Delta t = 2$ ). Error bars show  $\pm$ SEM ( $n = 18$  to 32). (B) Boxplot of  $\Delta E_M$  values at  $\Delta t = 5.5$  to 6.5 from curves in (A). (C) Boxplot of resting  $E_M$  values averaged over the 5 s before  $P_i$  application. Values correspond to measurements shown in Figure 3A and B. Boxes indicate the 25 and 75 percentile, the horizontal line shows the median, error bars represent  $\pm$ SD. Closed circles show individual measurements. When indicated significance was tested with a one-way ANOVA and a post-hoc Tukey test. Equal letters at the top of the panel indicate  $p > 0.05$ .

| Name              | Sequence 5' to 3'                                       | purpose       |
|-------------------|---------------------------------------------------------|---------------|
| PHT1;4_fwd        | GCGCAAAGCATGAACGCAATTC                                  | qPCR          |
| PHT1;4_rev        | CGTGCTACACAAGGCGATTAGC                                  | qPCR          |
| PHT1;1_fwd        | GGAGCCATTGTTGGAGCCTTTG                                  | qPCR          |
| PHT1;1_rev        | CGTCTACCTTGGCCTTGTCTTGTG                                | qPCR          |
| ACTIN2_fwd        | CTTGTTCCAGCCCTCGTTTGTG                                  | qPCR          |
| ACTIN2_rev        | CCTTGGAGATCCACATCTGCTG                                  | qPCR          |
| Ubox_fwd          | TGCGCTGCCAGATAATACTACTATT                               | qPCR          |
| Ubox_rev          | TGCTGCCCAACATCAGGTT                                     | qPCR          |
| ZAT12_fwd         | TTGGTTACACGCGCTTTGTTGC                                  | qPCR          |
| ZAT12_rev         | ACAAGCCACTCTCTTCCCCTG                                   | qPCR          |
| PLP2_fwd          | AACCCGGCTTTGTTGGCCATTG                                  | qPCR          |
| PLP2_rev          | TTCCGGTTCCAAGCGAAAGCAC                                  | qPCR          |
| PHT1;4_234_Sall-f | TAGTCGACtctcaaggtcgaagatgcc                             | pGEX cloning  |
| PHT1;4_294_NotI-r | TAGCGGCCGCTTAATGGCGACTCATGAATTC                         | pGEX cloning  |
| PHT1;4_503_Sall-f | TAGTCGACtctgtacctgaatctaaagg                            | pGEX cloning  |
| PHT1;4_NotI-r     | TAGCGGCCGCTTAAACTATTGGGACCGTTC                          | pGEX cloning  |
| PHT1.1_233_Sall-f | TAGTCGACtccgtatgaagatgcctg                              | pGEX cloning  |
| PHT1.1_293_NotI-r | TAGCGGCCGCTTAatggcgtctaaggaattc                         | pGEX cloning  |
| PHT1.4_B1-f       | GGGGACAAGTTTGTACAAAAAAGCAGGCTTTatggcaaggaacaattac       | pDONR cloning |
| PHT1.4-B2-r       | GGGGACCACTTTGTACAAGAAAGCTGGGTCAACTATTGGGACCGTTC         | pDONR cloning |
| 338F              | ACTCCTACGGGAGGCAGCA                                     | 16s rRNA seq  |
| 806R              | GGACTACHVGGGTWTCTAAT                                    | 16s rRNA seq  |
| Illumina-PCR-F    | AATGATACGGCGACCACCGAGATCTACACGCCTCCCTCGCGCCATCAGAGATGTG | 16s rRNA seq  |

**Table S1. Primers used in this study. Related to STAR Methods.**

| Name       | Sequence 5' to 3'                                              |
|------------|----------------------------------------------------------------|
| PCR_R_bc1  | CAAGCAGAAGACGGCATAACGAGAT TTACCGACG GTGACTGGAGTTCAGACGTGTGCTC  |
| PCR_R_bc2  | CAAGCAGAAGACGGCATAACGAGAT ATTGGACAC GTGACTGGAGTTCAGACGTGTGCTC  |
| PCR_R_bc3  | CAAGCAGAAGACGGCATAACGAGAT TCGCATGGA GTGACTGGAGTTCAGACGTGTGCTC  |
| PCR_R_bc4  | CAAGCAGAAGACGGCATAACGAGAT AGCGAACCT GTGACTGGAGTTCAGACGTGTGCTC  |
| PCR_R_bc5  | CAAGCAGAAGACGGCATAACGAGAT AGCTTCGAC GTGACTGGAGTTCAGACGTGTGCTC  |
| PCR_R_bc6  | CAAGCAGAAGACGGCATAACGAGAT GTCAGCCGT GTGACTGGAGTTCAGACGTGTGCTC  |
| PCR_R_bc7  | CAAGCAGAAGACGGCATAACGAGAT TCCAGATAG GTGACTGGAGTTCAGACGTGTGCTC  |
| PCR_R_bc8  | CAAGCAGAAGACGGCATAACGAGAT GAGAGTCCA GTGACTGGAGTTCAGACGTGTGCTC  |
| PCR_R_bc9  | CAAGCAGAAGACGGCATAACGAGAT GCTCACAAAT GTGACTGGAGTTCAGACGTGTGCTC |
| PCR_R_bc10 | CAAGCAGAAGACGGCATAACGAGAT TTGACGACA GTGACTGGAGTTCAGACGTGTGCTC  |
| PCR_R_bc11 | CAAGCAGAAGACGGCATAACGAGAT CTTAGAACG GTGACTGGAGTTCAGACGTGTGCTC  |
| PCR_R_bc12 | CAAGCAGAAGACGGCATAACGAGAT CGGTTTACA GTGACTGGAGTTCAGACGTGTGCTC  |
| PCR_R_bc13 | CAAGCAGAAGACGGCATAACGAGAT CGATAGGCC GTGACTGGAGTTCAGACGTGTGCTC  |
| PCR_R_bc14 | CAAGCAGAAGACGGCATAACGAGAT GCTATATCC GTGACTGGAGTTCAGACGTGTGCTC  |
| PCR_R_bc15 | CAAGCAGAAGACGGCATAACGAGAT GTCTTCAGC GTGACTGGAGTTCAGACGTGTGCTC  |
| PCR_R_bc16 | CAAGCAGAAGACGGCATAACGAGAT TAGACACCG GTGACTGGAGTTCAGACGTGTGCTC  |

|            |                           |           |                           |
|------------|---------------------------|-----------|---------------------------|
| PCR_R_bc17 | CAAGCAGAAGACGGCATAACGAGAT | TCAGCTGAC | GTGACTGGAGTTCAGACGTGTGCTC |
| PCR_R_bc18 | CAAGCAGAAGACGGCATAACGAGAT | TAAGTCGGC | GTGACTGGAGTTCAGACGTGTGCTC |
| PCR_R_bc19 | CAAGCAGAAGACGGCATAACGAGAT | GCTCCTTAG | GTGACTGGAGTTCAGACGTGTGCTC |
| PCR_R_bc20 | CAAGCAGAAGACGGCATAACGAGAT | ATGGCCTGA | GTGACTGGAGTTCAGACGTGTGCTC |
| PCR_R_bc21 | CAAGCAGAAGACGGCATAACGAGAT | TTGCAAGTA | GTGACTGGAGTTCAGACGTGTGCTC |
| PCR_R_bc22 | CAAGCAGAAGACGGCATAACGAGAT | CCTAGTAAG | GTGACTGGAGTTCAGACGTGTGCTC |
| PCR_R_bc23 | CAAGCAGAAGACGGCATAACGAGAT | CTAGGATCA | GTGACTGGAGTTCAGACGTGTGCTC |
| PCR_R_bc24 | CAAGCAGAAGACGGCATAACGAGAT | TATGAACGT | GTGACTGGAGTTCAGACGTGTGCTC |
| PCR_R_bc25 | CAAGCAGAAGACGGCATAACGAGAT | CTTGTGCGA | GTGACTGGAGTTCAGACGTGTGCTC |
| PCR_R_bc26 | CAAGCAGAAGACGGCATAACGAGAT | CACGATGGT | GTGACTGGAGTTCAGACGTGTGCTC |
| PCR_R_bc27 | CAAGCAGAAGACGGCATAACGAGAT | ACGTGCCTT | GTGACTGGAGTTCAGACGTGTGCTC |
| PCR_R_bc28 | CAAGCAGAAGACGGCATAACGAGAT | TGAACTAGC | GTGACTGGAGTTCAGACGTGTGCTC |
| PCR_R_bc29 | CAAGCAGAAGACGGCATAACGAGAT | TATTCAGCG | GTGACTGGAGTTCAGACGTGTGCTC |
| PCR_R_bc30 | CAAGCAGAAGACGGCATAACGAGAT | TAATCGGTG | GTGACTGGAGTTCAGACGTGTGCTC |
| PCR_R_bc31 | CAAGCAGAAGACGGCATAACGAGAT | GCGTCCATG | GTGACTGGAGTTCAGACGTGTGCTC |
| PCR_R_bc32 | CAAGCAGAAGACGGCATAACGAGAT | CGTAAGATG | GTGACTGGAGTTCAGACGTGTGCTC |
| PCR_R_bc33 | CAAGCAGAAGACGGCATAACGAGAT | CTGTTACAG | GTGACTGGAGTTCAGACGTGTGCTC |
| PCR_R_bc34 | CAAGCAGAAGACGGCATAACGAGAT | ACGATCATC | GTGACTGGAGTTCAGACGTGTGCTC |
| PCR_R_bc35 | CAAGCAGAAGACGGCATAACGAGAT | GTAACGGCT | GTGACTGGAGTTCAGACGTGTGCTC |
| PCR_R_bc36 | CAAGCAGAAGACGGCATAACGAGAT | CCATGCTTA | GTGACTGGAGTTCAGACGTGTGCTC |
| PCR_R_bc37 | CAAGCAGAAGACGGCATAACGAGAT | GTACGCACA | GTGACTGGAGTTCAGACGTGTGCTC |
| PCR_R_bc38 | CAAGCAGAAGACGGCATAACGAGAT | TTAGAGCCA | GTGACTGGAGTTCAGACGTGTGCTC |
| PCR_R_bc39 | CAAGCAGAAGACGGCATAACGAGAT | ATAAGGTCG | GTGACTGGAGTTCAGACGTGTGCTC |
| PCR_R_bc40 | CAAGCAGAAGACGGCATAACGAGAT | AGTGGCACT | GTGACTGGAGTTCAGACGTGTGCTC |
| PCR_R_bc41 | CAAGCAGAAGACGGCATAACGAGAT | CCAGAAGTG | GTGACTGGAGTTCAGACGTGTGCTC |
| PCR_R_bc42 | CAAGCAGAAGACGGCATAACGAGAT | CTACTAGCG | GTGACTGGAGTTCAGACGTGTGCTC |
| PCR_R_bc43 | CAAGCAGAAGACGGCATAACGAGAT | TAGCGTTC  | GTGACTGGAGTTCAGACGTGTGCTC |
| PCR_R_bc44 | CAAGCAGAAGACGGCATAACGAGAT | GTGAGTCAT | GTGACTGGAGTTCAGACGTGTGCTC |
| PCR_R_bc45 | CAAGCAGAAGACGGCATAACGAGAT | TGGTCCTAC | GTGACTGGAGTTCAGACGTGTGCTC |
| PCR_R_bc46 | CAAGCAGAAGACGGCATAACGAGAT | TACGCGTAC | GTGACTGGAGTTCAGACGTGTGCTC |
| PCR_R_bc47 | CAAGCAGAAGACGGCATAACGAGAT | GAGCCATCT | GTGACTGGAGTTCAGACGTGTGCTC |
| PCR_R_bc48 | CAAGCAGAAGACGGCATAACGAGAT | CGTCCGTAT | GTGACTGGAGTTCAGACGTGTGCTC |
| PCR_R_bc49 | CAAGCAGAAGACGGCATAACGAGAT | GATACGTTT | GTGACTGGAGTTCAGACGTGTGCTC |
| PCR_R_bc50 | CAAGCAGAAGACGGCATAACGAGAT | CAGCTGGTT | GTGACTGGAGTTCAGACGTGTGCTC |
| PCR_R_bc51 | CAAGCAGAAGACGGCATAACGAGAT | TTAAGCGCC | GTGACTGGAGTTCAGACGTGTGCTC |
| PCR_R_bc52 | CAAGCAGAAGACGGCATAACGAGAT | CCTGCGAAG | GTGACTGGAGTTCAGACGTGTGCTC |
| PCR_R_bc53 | CAAGCAGAAGACGGCATAACGAGAT | TTGTAGCCG | GTGACTGGAGTTCAGACGTGTGCTC |
| PCR_R_bc54 | CAAGCAGAAGACGGCATAACGAGAT | TCTGTAGAG | GTGACTGGAGTTCAGACGTGTGCTC |
| PCR_R_bc55 | CAAGCAGAAGACGGCATAACGAGAT | CTATTAAGC | GTGACTGGAGTTCAGACGTGTGCTC |
| PCR_R_bc56 | CAAGCAGAAGACGGCATAACGAGAT | CTCTGAGGT | GTGACTGGAGTTCAGACGTGTGCTC |
| PCR_R_bc57 | CAAGCAGAAGACGGCATAACGAGAT | CAGGATTCG | GTGACTGGAGTTCAGACGTGTGCTC |
| PCR_R_bc58 | CAAGCAGAAGACGGCATAACGAGAT | TCACTGCTA | GTGACTGGAGTTCAGACGTGTGCTC |
| PCR_R_bc59 | CAAGCAGAAGACGGCATAACGAGAT | ACATGTAC  | GTGACTGGAGTTCAGACGTGTGCTC |
| PCR_R_bc60 | CAAGCAGAAGACGGCATAACGAGAT | ATTCTGCCG | GTGACTGGAGTTCAGACGTGTGCTC |

|            |                           |            |                           |
|------------|---------------------------|------------|---------------------------|
| PCR_R_bc61 | CAAGCAGAAGACGGCATAACGAGAT | TACACGCTG  | GTGACTGGAGTTCAGACGTGTGCTC |
| PCR_R_bc62 | CAAGCAGAAGACGGCATAACGAGAT | TGCATAACAC | GTGACTGGAGTTCAGACGTGTGCTC |
| PCR_R_bc63 | CAAGCAGAAGACGGCATAACGAGAT | ACGCAATGT  | GTGACTGGAGTTCAGACGTGTGCTC |
| PCR_R_bc64 | CAAGCAGAAGACGGCATAACGAGAT | GCTCGAAGA  | GTGACTGGAGTTCAGACGTGTGCTC |
| PCR_R_bc65 | CAAGCAGAAGACGGCATAACGAGAT | AGACGTTGC  | GTGACTGGAGTTCAGACGTGTGCTC |
| PCR_R_bc66 | CAAGCAGAAGACGGCATAACGAGAT | TAGAGCTGC  | GTGACTGGAGTTCAGACGTGTGCTC |
| PCR_R_bc67 | CAAGCAGAAGACGGCATAACGAGAT | GGTAACCTC  | GTGACTGGAGTTCAGACGTGTGCTC |
| PCR_R_bc68 | CAAGCAGAAGACGGCATAACGAGAT | GACTTCATG  | GTGACTGGAGTTCAGACGTGTGCTC |
| PCR_R_bc69 | CAAGCAGAAGACGGCATAACGAGAT | CTGCATACT  | GTGACTGGAGTTCAGACGTGTGCTC |
| PCR_R_bc70 | CAAGCAGAAGACGGCATAACGAGAT | TAAGGCATC  | GTGACTGGAGTTCAGACGTGTGCTC |
| PCR_R_bc71 | CAAGCAGAAGACGGCATAACGAGAT | AGTATTTCG  | GTGACTGGAGTTCAGACGTGTGCTC |
| PCR_R_bc72 | CAAGCAGAAGACGGCATAACGAGAT | TTTCGCAGAT | GTGACTGGAGTTCAGACGTGTGCTC |
| PCR_R_bc73 | CAAGCAGAAGACGGCATAACGAGAT | GCACCTGTT  | GTGACTGGAGTTCAGACGTGTGCTC |
| PCR_R_bc74 | CAAGCAGAAGACGGCATAACGAGAT | CTCATGGTA  | GTGACTGGAGTTCAGACGTGTGCTC |
| PCR_R_bc75 | CAAGCAGAAGACGGCATAACGAGAT | ACTAGTTGG  | GTGACTGGAGTTCAGACGTGTGCTC |
| PCR_R_bc76 | CAAGCAGAAGACGGCATAACGAGAT | GCGGACTAT  | GTGACTGGAGTTCAGACGTGTGCTC |
| PCR_R_bc77 | CAAGCAGAAGACGGCATAACGAGAT | ATCGCTTAA  | GTGACTGGAGTTCAGACGTGTGCTC |
| PCR_R_bc78 | CAAGCAGAAGACGGCATAACGAGAT | TCAGGACGT  | GTGACTGGAGTTCAGACGTGTGCTC |
| PCR_R_bc79 | CAAGCAGAAGACGGCATAACGAGAT | GCATTACTG  | GTGACTGGAGTTCAGACGTGTGCTC |
| PCR_R_bc80 | CAAGCAGAAGACGGCATAACGAGAT | GCTATGGAA  | GTGACTGGAGTTCAGACGTGTGCTC |
| PCR_R_bc81 | CAAGCAGAAGACGGCATAACGAGAT | GATTGTGCA  | GTGACTGGAGTTCAGACGTGTGCTC |
| PCR_R_bc82 | CAAGCAGAAGACGGCATAACGAGAT | AGCCTCATG  | GTGACTGGAGTTCAGACGTGTGCTC |
| PCR_R_bc83 | CAAGCAGAAGACGGCATAACGAGAT | AACTCCTGT  | GTGACTGGAGTTCAGACGTGTGCTC |
| PCR_R_bc84 | CAAGCAGAAGACGGCATAACGAGAT | TAGAAGGCT  | GTGACTGGAGTTCAGACGTGTGCTC |
| PCR_R_bc85 | CAAGCAGAAGACGGCATAACGAGAT | GACTAGTCA  | GTGACTGGAGTTCAGACGTGTGCTC |
| PCR_R_bc86 | CAAGCAGAAGACGGCATAACGAGAT | GGATACTCG  | GTGACTGGAGTTCAGACGTGTGCTC |
| PCR_R_bc87 | CAAGCAGAAGACGGCATAACGAGAT | CCGACATTG  | GTGACTGGAGTTCAGACGTGTGCTC |
| PCR_R_bc88 | CAAGCAGAAGACGGCATAACGAGAT | TCGTGACGC  | GTGACTGGAGTTCAGACGTGTGCTC |
| PCR_R_bc89 | CAAGCAGAAGACGGCATAACGAGAT | GGCCTATAA  | GTGACTGGAGTTCAGACGTGTGCTC |
| PCR_R_bc90 | CAAGCAGAAGACGGCATAACGAGAT | GTAGCACTC  | GTGACTGGAGTTCAGACGTGTGCTC |
| PCR_R_bc91 | CAAGCAGAAGACGGCATAACGAGAT | CTAAGACGT  | GTGACTGGAGTTCAGACGTGTGCTC |
| PCR_R_bc92 | CAAGCAGAAGACGGCATAACGAGAT | CGTGCACAA  | GTGACTGGAGTTCAGACGTGTGCTC |
| PCR_R_bc93 | CAAGCAGAAGACGGCATAACGAGAT | TGTAACGCC  | GTGACTGGAGTTCAGACGTGTGCTC |
| PCR_R_bc94 | CAAGCAGAAGACGGCATAACGAGAT | ATGCGAGAC  | GTGACTGGAGTTCAGACGTGTGCTC |
| PCR_R_bc95 | CAAGCAGAAGACGGCATAACGAGAT | CCGTCAAGA  | GTGACTGGAGTTCAGACGTGTGCTC |
| PCR_R_bc96 | CAAGCAGAAGACGGCATAACGAGAT | TAGTAGCAC  | GTGACTGGAGTTCAGACGTGTGCTC |

**Table S2. Reverse primers for bacterial 16s rRNA sequencing. Related to STAR Methods.**
